# Supplementary material for: Espacios de funciones analíticas caracterizados por propiedades de las derivadas de sus elementos
Source: Royal Society of Chemistry journal article supplement (doi:10.1039/c8sc04338h), 2000-01-01
Supplement: c8sc04338h1.pdf [file c8sc04338h1.pdf]

Electronic Supplementary Information

**Selective recognition of choline phosphate by tripodal  
hexa-urea receptors with dual binding sites: crystal and  
solution evidence**

Wei Zuo,<sup>#</sup> Chuandong Jia,<sup>#</sup> Huizheng Zhang, Yanxia Zhao, Xiao-Juan Yang,\* and Biao Wu\*

*Key Laboratory of Synthetic and Natural Functional Molecule Chemistry of the Ministry of Education, College of Chemistry and Materials Science, Northwest University, Xi'an 710127, China*

-----  
**Table of Contents:**

**S1.** General considerations

**S2.** Synthesis of **L**<sup>2</sup> and complexes **1–3**

**S3.** X-ray crystal structure analysis

**S4.** Host-guest binding studies

**S5.** Fluorescence studies  
-----

**S1. General considerations**

All reagents were obtained commercially and used without further purification. All NMR spectra were obtained at 20 °C by using Bruker AVANCE III-400 MHz spectrometers. <sup>1</sup>H and <sup>13</sup>C NMR chemical shifts were reported relative to residual solvent peaks (<sup>1</sup>H NMR: 2.50 ppm for [D<sub>6</sub>]DMSO; <sup>13</sup>C NMR: 39.52 ppm for [D<sub>6</sub>]DMSO). Infrared (IR) spectra were recorded on a Bruker EQUIOX-55 spectrometer. Mass spectra

of ligand  $L^2$  and complexes **1–3** were measured with a Bruker micrOTOF-Q II ESI-Q-TOF LC/MS/MS spectrometer. Melting points were detected on an X-4 Digital Vision MP instrument. Fluorescence spectra were measured on a Horiba FL1039A/40A spectrophotometer in a 1 cm quartz cell.

## S2. Synthesis of $L^2$ and complexes **1–3**

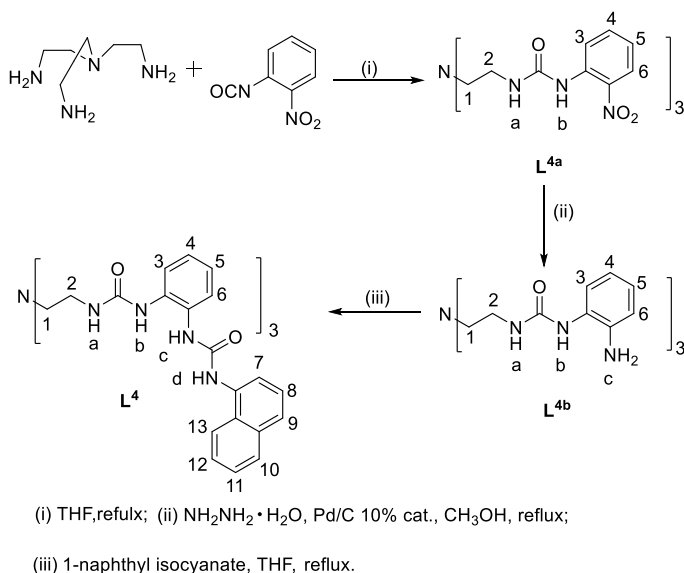

**Scheme S1.** Synthesis of the ligand  $L^2$ .

**$L^{2a}$ :** Compound  $L^{2a}$  was prepared according to reported literature procedures.  $^1\text{H}$  NMR (400 MHz,  $[\text{D}_6]\text{DMSO}$ , ppm):  $\delta$  9.37 (s, 3H, NHb), 8.24 (d,  $J = 8.0$  Hz, 3H, H6), 8.00 (d,  $J = 8.0$  Hz, 3H, H3), 7.58 (t,  $J = 8.0$  Hz, 3H, H4), 7.47 (s, 3H, NHa), 7.08 (t,  $J = 5.0$  Hz, 3H, H5), 3.21 (m, 6H, H2), 2.64 (t,  $J = 6.4$  Hz, 6H, H1).

**$L^{2b}$ :** Compound  $L^{2b}$  was prepared according to reported literature procedures.  $^1\text{H}$  NMR (400 MHz,  $[\text{D}_6]\text{DMSO}$ , ppm):  $\delta$  7.61 (s, 3H, Hb), 7.21 (d,  $J = 8.0$  Hz, 3H H3), 6.78 (t,  $J = 8.0$  Hz, 3H, H5), 6.68 (d, 3H,  $J = 8.0$  Hz, H6), 6.50 (t,  $J = 8.0$  Hz, 3H, H4), 6.21 (t,  $J = 5.4$  Hz, 3H, Ha), 4.70 (s, 6H, Hc), 3.17 (m, 6H, H2), 2.57 (t,  $J = 6.4$  Hz, 6H, H1).

**Ligand  $L^2$ :**  $L^{2b}$  (0.5 g, 0.91 mmol) was added to a solution (4 mL DMF/20 mL THF) of 1-naphthyl isocyanate (0.51 g, 3.0 mmol). The mixture was refluxed over night and the precipitate thus obtained was filtered off and washed with THF and diethyl ether and then dried over vacuum to yield a white solid (0.84 g, 87%). M.p. 195 °C.  $^1\text{H}$  NMR (400 MHz,  $[\text{D}_6]\text{DMSO}$ , ppm):  $\delta$  9.10 (s, 3H, NHd), 8.44(s, 3H, NHc), 8.15 (d,  $J = 8.0$  Hz, 3H, H13), 7.98 (d,  $J = 8.0$  Hz, 3H, H7), 7.97 (s, 3H, NHb), 7.91 (d,  $J = 8.0$  Hz, 3H, H10), 7.61 (m, 6H, H6 + H9), 7.43-7.57 (m, 12H, H3 + H8 + H11 + H12), 7.00 (m, 6H, H4 + H5), 6.54 (t,  $J = 5.0$  Hz, 3H, NHa), 3.20 (m, 6H, H2), 2.61 (t,  $J = 6.8$  Hz, 6H, H1).  $^{13}\text{C}$  NMR (100 MHz,  $[\text{D}_6]\text{DMSO}$ ): 156.1,

153.7, 134.5, 133.7, 131.6, 131.2, 128.4, 126.1, 125.9, 125.6, 123.9, 123.6, 123.6, 123.5, 122.9, 121.6, 117.7, 54.1, 37.9. IR (KBr,  $\text{cm}^{-1}$ ): 3286, 3063, 2964, 1641, 1551, 1451, 1345, 1394, 1309, 1251, 802, 797. Anal. Calcd for  $\text{C}_{60}\text{H}_{57}\text{N}_{13}\text{O}_6$ : C, 68.23; H, 5.44; N, 17.24. Found: C, 67.96; H, 5.71; N, 16.88. MS:  $m/z$  Calcd. for  $[\text{M}+\text{Cl}]^-$ , 1090.4237, found 1090.4435.

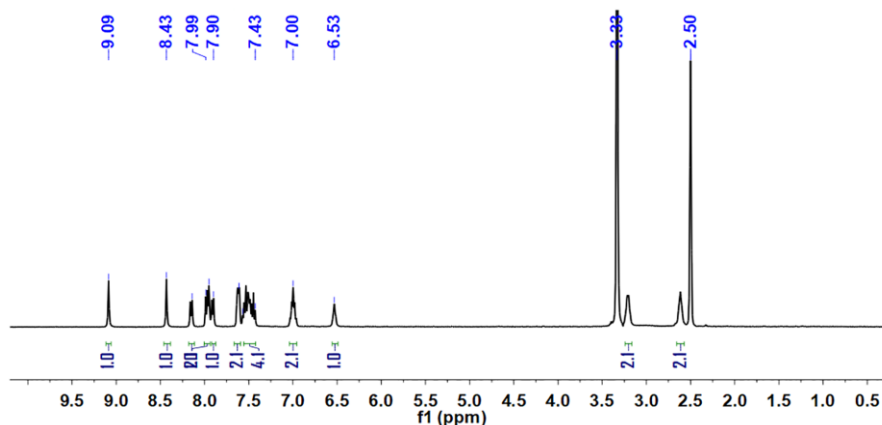

Fig. S1.  $^1\text{H}$  NMR spectrum of ligand  $\text{L}^2$  (400 MHz,  $\text{DMSO-}d_6$ ).

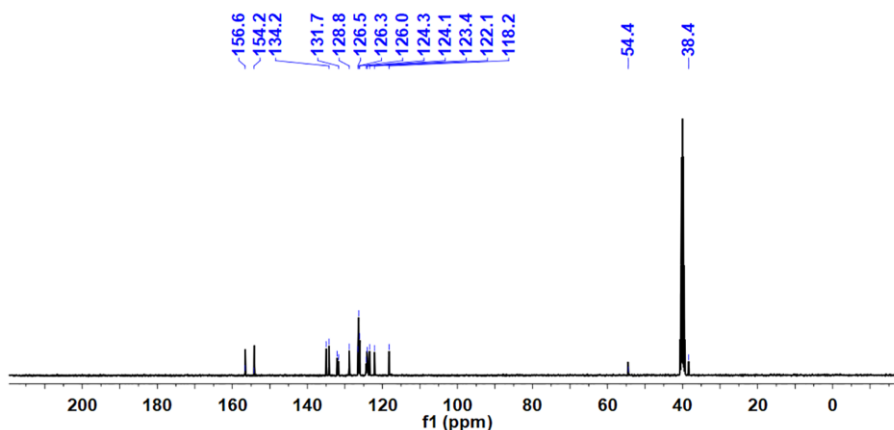

Fig. S2.  $^{13}\text{C}$  NMR spectrum of compound  $\text{L}^2$  (100 MHz,  $\text{DMSO-}d_6$ ).

### Complex $\text{Ch}_2[\text{L}^2\text{PO}_4(\text{Ch})]$ (**1**)

$\text{Ch}_3\text{PO}_4$  (1 mol/L, 20  $\mu\text{L}$ , generated by choline hydroxide and  $\text{H}_3\text{PO}_4$  in water) was added to a suspension of  $\text{L}^2$  (20 mg, 0.02 mmol) in acetonitrile (4 mL). After stirring overnight at room temperature, a clear colorless solution was obtained. Slow vapor diffusion of diethyl ether into this solution provided colorless crystals of complex  $(\text{Ch})_2[\text{L}^2\text{PO}_4(\text{Ch})_3]$  within three weeks. The identity of complex **1** was confirmed by HR MS (Fig. S6).

### Complex (TBA)[L<sup>1</sup>⊃CP] (2)

CP (0.25 mol/L, 80  $\mu$ L, as TBA<sup>+</sup> salt generated by calcium phosphorylcholine chloride and (TBA)OH in water) was added to a suspension of L<sup>1</sup> (20 mg, 0.02 mmol) in acetonitrile (4 mL). After stirring overnight at room temperature, a clear yellow solution was obtained. Slow vapor diffusion of diethyl ether into this solution provided yellow crystals of complex (TBA)[L<sup>1</sup>⊃CP] within two weeks. The identity of complex **2** was confirmed by HR MS (Fig. S7).

### Complex (TMA)[L<sup>2</sup>⊃CP] (3)

In a similar manner, treatment of L<sup>2</sup> (20 mg, 0.02 mmol) with CP (0.25 mol/L, 80  $\mu$ L, as TMA<sup>+</sup> salt) in acetonitrile (4 mL), followed by slow vapor diffusion of diethyl ether into the solution, provided colorless crystals of complex **3** within three weeks. The identity of **3** was confirmed by HR MS (Fig. S8).

### S3. X-ray crystal structure analysis

X-ray diffraction data for complexes **1** and **3** were collected on a Bruker SMART APEX II diffractometer at 153 K with graphite-monochromated Mo K $\alpha$  radiation ( $\lambda = 0.71073$  Å). The diffraction data of complex **2** were collected on a Rigaku XtaLAB Pro diffractometer at 153 K with Cu-K $\alpha$  radiation ( $\lambda = 1.54178$  Å). An empirical absorption correction using SADABS was applied for all data. The structures of complexes **1**, **2** and **3** were solved by direct methods using the SHELXS-2014 program. All non-hydrogen atoms were refined anisotropically by full-matrix least-squares on  $F^2$  by the use of the SHELXL program. Hydrogen atoms bonded to carbon and nitrogen atoms were included in idealized geometric positions with thermal parameters equivalent to 1.2 times those of the atom to which they were attached.

The remaining solvents could not be successfully resolved despite numerous attempts at modeling, and consequently the SQUEEZE function of PLATON was used to account for these highly disordered solvents. The removed void electron density corresponds to about 3.3 water molecules for complex **2** and 4.1 for complex **3**. The counter cations of complexes **1** and **2** were refined with restraints.

CCDC 1859609–1859611 contain the supplementary crystallographic data of complexes **1–3**. These data can be obtained free of charge from The Cambridge Crystallographic Data Centre via [www.ccdc.cam.ac.uk/data\\_request/cif](http://www.ccdc.cam.ac.uk/data_request/cif)

**Table S1.** Crystal data and refinement details of complex 1–3.

|                                                     | complex 1                                                         | complex 2                                                         | complex 3                                                         |
|-----------------------------------------------------|-------------------------------------------------------------------|-------------------------------------------------------------------|-------------------------------------------------------------------|
| Empirical formula                                   | C <sub>75</sub> H <sub>99</sub> N <sub>16</sub> O <sub>13</sub> P | C <sub>69</sub> H <sub>97</sub> N <sub>18</sub> O <sub>16</sub> P | C <sub>69</sub> H <sub>82</sub> N <sub>15</sub> O <sub>10</sub> P |
| Formula weight                                      | 1462.73                                                           | 1464.71                                                           | 1311.61                                                           |
| Crystal System                                      | Orthorhombic                                                      | Monoclinic                                                        | Triclinic                                                         |
| Space group                                         | <i>Pna</i> 2(1)                                                   | <i>P</i> 2(1)/ <i>n</i>                                           | <i>P</i> -1                                                       |
| <i>a</i> (Å)                                        | 20.4627(5)                                                        | 22.7938(8)                                                        | 15.948(2)                                                         |
| <i>b</i> (Å)                                        | 15.7895(4)                                                        | 18.9289(4)                                                        | 16.487(2)                                                         |
| <i>c</i> (Å)                                        | 25.0638(6)                                                        | 23.1163(8)                                                        | 16.568(2)                                                         |
| $\alpha$ (deg)                                      | 90                                                                | 90                                                                | 98.9391(19)                                                       |
| $\beta$ (deg)                                       | 90                                                                | 119.257(5)                                                        | 95.3315(18)                                                       |
| $\gamma$ (deg)                                      | 90                                                                | 90                                                                | 117.1536(18)                                                      |
| <i>V</i> (Å <sup>3</sup> )                          | 8098.0(3)                                                         | 8701.5(6)                                                         | 3761.9(9)                                                         |
| <i>Z</i>                                            | 4                                                                 | 2                                                                 | 1                                                                 |
| <i>D</i> <sub>calc</sub> , g/cm <sup>3</sup>        | 1.282                                                             | 1.146                                                             | 1.189                                                             |
| No. of unique data                                  | 18196                                                             | 15239                                                             | 12835                                                             |
| <i>T</i> (K)                                        | 153(2)                                                            | 153(2)                                                            | 153(2)                                                            |
| Total no. of data                                   | 80538                                                             | 62489                                                             | 24057                                                             |
| Crystal size (mm)                                   | 0.25 × 0.20 × 0.20                                                | 0.25 × 0.22 × 0.20                                                | 0.25 × 0.20 × 0.20                                                |
| $\theta$ range                                      | 2.37–27.56                                                        | 2.23–66.50                                                        | 1.46–25.00                                                        |
| Completeness to $\theta$                            | 99.8 %                                                            | 99.3%                                                             | 96.9 %                                                            |
| <i>R</i> <sub>int</sub>                             | 0.0827                                                            | 0.0401                                                            | 0.0355                                                            |
| Goodness-of-fit-on <i>F</i> <sup>2</sup>            | 1.144                                                             | 1.044                                                             | 1.020                                                             |
| <i>R</i> <sub>1</sub> [ <i>I</i> > 2σ( <i>I</i> )]  | 0.0792                                                            | 0.1074                                                            | 0.0792                                                            |
| <i>wR</i> <sub>2</sub> [ <i>I</i> > 2σ( <i>I</i> )] | 0.1964                                                            | 0.2146                                                            | 0.1707                                                            |

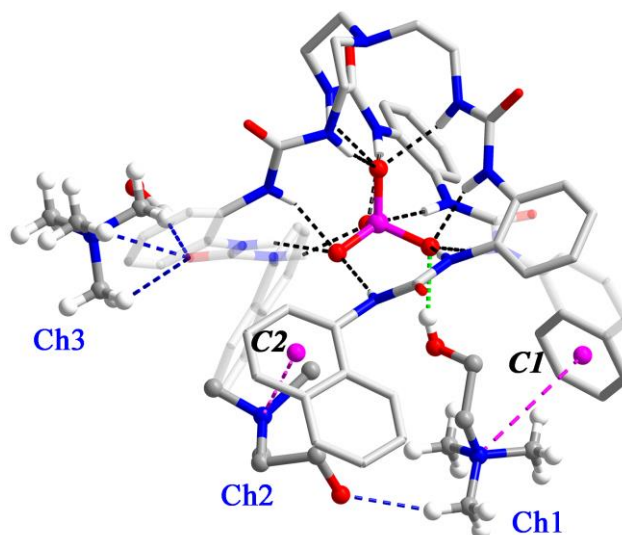

**Fig. S3.** Crystal structure of the ternary complex  $[L^2 \cdot PO_4^{3-} \cdot Ch]^2-$  showing the binding for the  $PO_4^{3-}$  anion and  $Ch^+$  cation (Ch1) respectively, and interactions of the other two  $Ch^+$  cations (Ch2 and Ch3), serving as counter ions, with the ligand. C1 and C2 represent centroids of aryl rings.

The Ch2 is located nearby and forms cation- $\pi$  interactions with another naphthyl group (purple dashed line,  $N \cdots C2$  distance: 4.194 Å). The hydroxyl tail of Ch2 associates to Ch1 via a hydrogen bond (blue dashed line,  $C \cdots O$  distance: 3.986 Å). The third choline ion (Ch3) is outside the tripodal cavity and the trimethylammonium head is bound with a urea carbonyl of the ligand via hydrogen bonds (blue dashed lines,  $C \cdots O$  distances range from 3.179 to 3.468 Å, av. 3.298 Å).

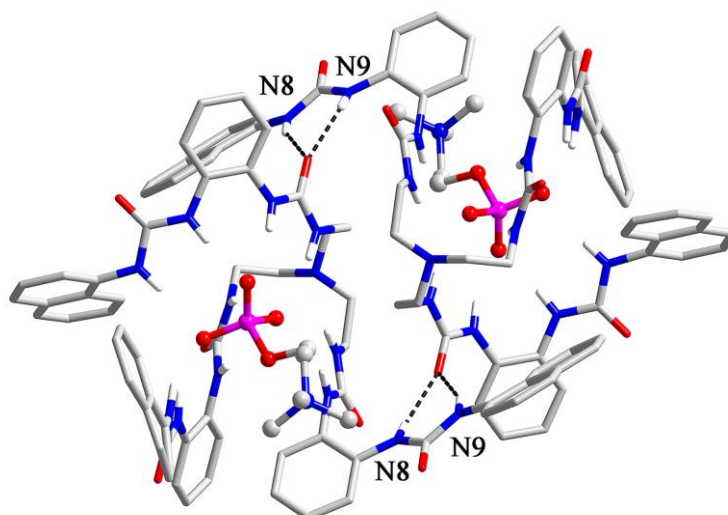

**Fig. S4.** A pair of symmetry-related urea $\cdots$ urea interactions dimerizes two  $[L^2 \supset CP]^-$  units.

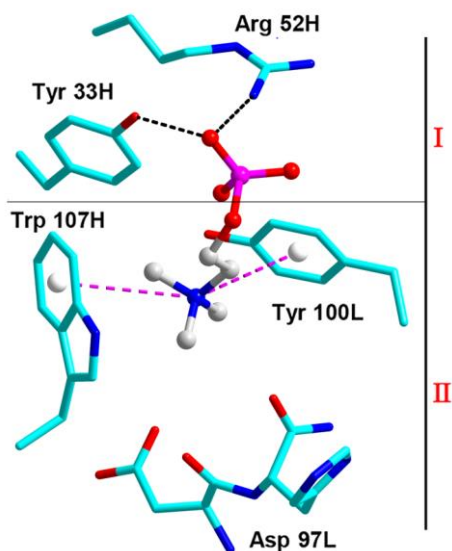

**Fig. S5.** Crystal structure of phosphocholine binding site of McPC603.<sup>2</sup> Tyr 33H (3.053 Å) and Arg 52H (2.922 Å) (site-I) provide hydrogen bonding for the phosphate group, while ion-ion (Asp97L) and cation- $\pi$  interactions (Trp 107H, and Tyr 100L) (site-II) (4.158-4.505 Å) provide the binding affinity for the trimethylammonium group. Prepared using pymol (<http://www.rcsb.org>) and PDB ID: 2MCP.

**Table S2.** Hydrogen bond parameters [ $\text{\AA}$  and  $^\circ$ ] in the crystal structure of complex  $\text{Ch}_2[\text{L}^2\cdot\text{PO}_4\text{Ch}]$  (**1**).

| D-H...A       | d(D-H) ( $\text{\AA}$ ) | d(H...A) ( $\text{\AA}$ ) | d(D...A) ( $\text{\AA}$ ) | $\angle(\text{DHA})$ ( $^\circ$ ) |
|---------------|-------------------------|---------------------------|---------------------------|-----------------------------------|
| N2-H2...O7    | 0.88                    | 2.03                      | 2.787(17)                 | 143                               |
| N3-H3...O9    | 0.88                    | 2.01                      | 2.837(16)                 | 156                               |
| N4-H4...O9    | 0.88                    | 1.85                      | 2.708(18)                 | 164                               |
| N5-H5A...O10  | 0.88                    | 1.95                      | 2.764(18)                 | 153                               |
| N6-H6A...O7   | 0.88                    | 2.04                      | 2.786(2)                  | 142                               |
| N7-H7A...O8   | 0.88                    | 2.19                      | 3.038(19)                 | 162                               |
| N8-H8A...O8   | 0.88                    | 1.84                      | 2.716(18)                 | 173                               |
| N9-H9...O9    | 0.88                    | 2.04                      | 2.811(17)                 | 146                               |
| N10-H10...O7  | 0.88                    | 2.16                      | 2.906(18)                 | 142                               |
| N11-H11...O10 | 0.88                    | 2.03                      | 2.864(18)                 | 158                               |
| N12-H12...O10 | 0.88                    | 1.91                      | 2.789(18)                 | 173                               |
| N13-H13A...O8 | 0.88                    | 1.93                      | 2.754(19)                 | 156                               |

**Table S3.** Hydrogen bond parameters [ $\text{\AA}$  and  $^\circ$ ] in the crystal structure of complex (TBA)[ $\text{L}^1\supset\text{CP}$ ] (**2**).

| D–H...A        | d(D–H) ( $\text{\AA}$ ) | d(H...A) ( $\text{\AA}$ ) | d(D...A) ( $\text{\AA}$ ) | $\angle(\text{DHA})$ ( $^\circ$ ) |
|----------------|-------------------------|---------------------------|---------------------------|-----------------------------------|
| N2–H2...O16    | 0.88                    | 2.12                      | 2.921(5)                  | 152                               |
| N3–H3...O16    | 0.88                    | 2.17                      | 2.935(5)                  | 145                               |
| N4–H4...O14    | 0.88                    | 2.15                      | 2.954(5)                  | 152                               |
| N5–H5A...O14   | 0.88                    | 1.93                      | 2.771(6)                  | 158                               |
| N7–H7...O14    | 0.88                    | 2.19                      | 2.989(5)                  | 151                               |
| N8–H8...O14    | 0.88                    | 2.10                      | 2.906(6)                  | 152                               |
| N9–H9...O15    | 0.88                    | 2.13                      | 2.922(5)                  | 149                               |
| N10–H10...O15  | 0.88                    | 1.92                      | 2.762(4)                  | 158                               |
| N12–H12...O15  | 0.88                    | 2.13                      | 2.924(5)                  | 150                               |
| N13–H13A...O15 | 0.88                    | 2.04                      | 2.844(6)                  | 152                               |
| N14–H14...O16  | 0.88                    | 2.27                      | 3.053(6)                  | 148                               |
| N15–H15A...O16 | 0.88                    | 1.88                      | 2.748(6)                  | 166                               |

**Table S4.** Hydrogen bond parameters [ $\text{\AA}$  and  $^\circ$ ] in the crystal structure of complex (TMA)[ $\text{L}^2\supset\text{CP}$ ] (**3**).

| D–H...A       | d(D–H) ( $\text{\AA}$ ) | d(H...A) ( $\text{\AA}$ ) | d(D...A) ( $\text{\AA}$ ) | $\angle(\text{DHA})$ ( $^\circ$ ) |
|---------------|-------------------------|---------------------------|---------------------------|-----------------------------------|
| N2–H2...O7    | 0.88                    | 2.19                      | 3.029(4)                  | 159                               |
| N3–H3...O9    | 0.88                    | 1.91                      | 2.768(4)                  | 164                               |
| N4–H4...O9    | 0.88                    | 1.86                      | 2.736(5)                  | 172                               |
| N5–H5...O8    | 0.88                    | 2.25                      | 3.075(5)                  | 156                               |
| N6–H6...O7    | 0.88                    | 2.29                      | 3.019(4)                  | 140                               |
| N7–H7...O7    | 0.88                    | 2.26                      | 2.937(4)                  | 134                               |
| N10–H10...O7  | 0.88                    | 2.19                      | 2.942(4)                  | 143                               |
| N11–H11...O8  | 0.88                    | 2.38                      | 3.151(4)                  | 146                               |
| N12–H12A...O8 | 0.88                    | 2.07                      | 2.851(4)                  | 148                               |
| N13–H13A...O8 | 0.88                    | 2.10                      | 2.893(4)                  | 150                               |

#### S4. Host-guest binding studies



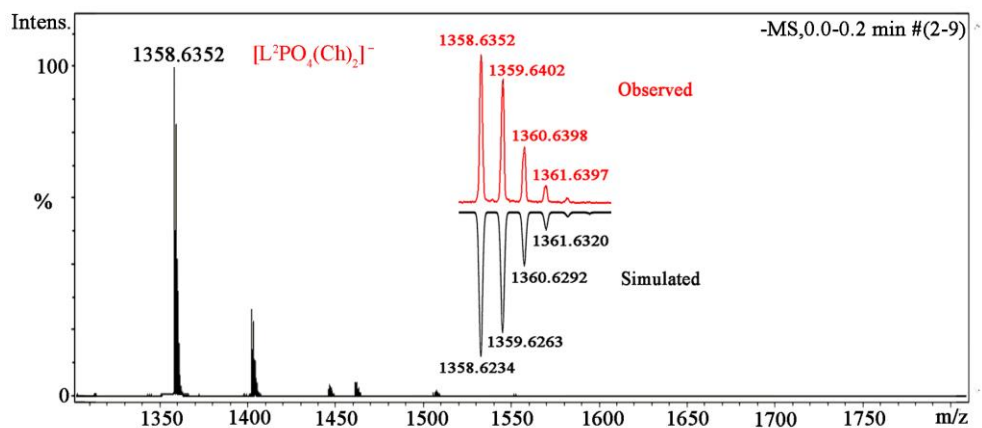

**Fig. S6.** High-resolution ESI-MS spectrum of complex  $Ch_2[L^2-PO_4^-]$  (1).

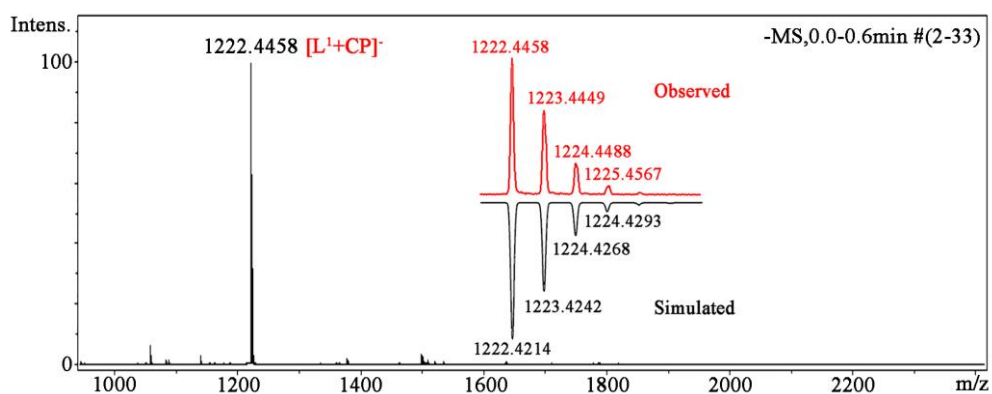

**Fig. S7.** High-resolution ESI-MS of complex  $(TBA)[L^1+CP]^-$  (2).

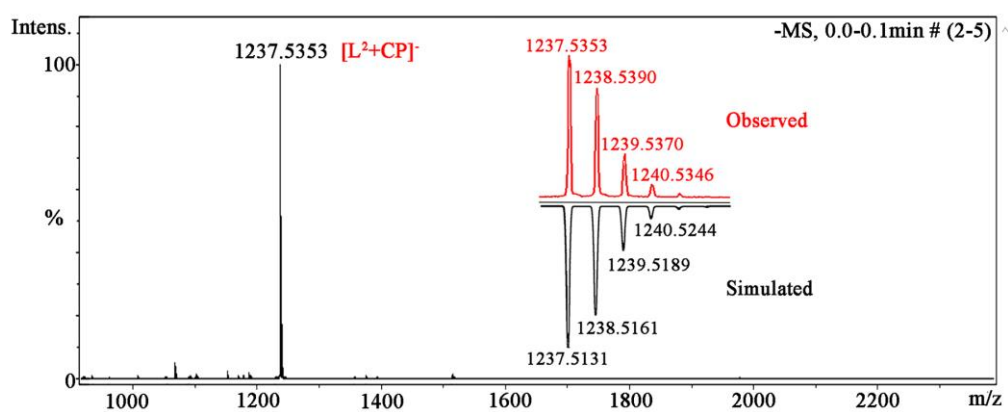

**Fig. S8.** High-resolution ESI-MS of  $(TMA)[L^2+CP]^-$  (3).

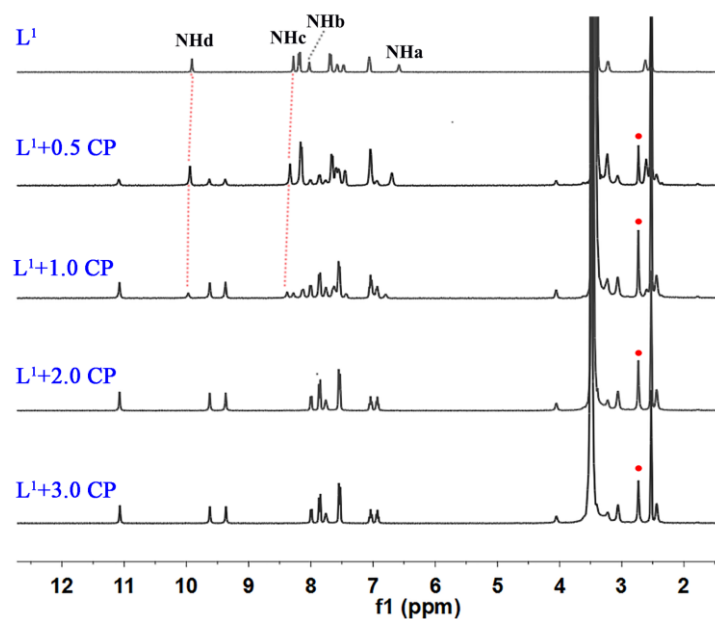

**Fig. S9.**  $^1\text{H}$  NMR titration of  $\text{L}^1$  (2 mM) with CP (DMSO- $d_6$  /2%  $\text{H}_2\text{O}$ , 400 MHz).

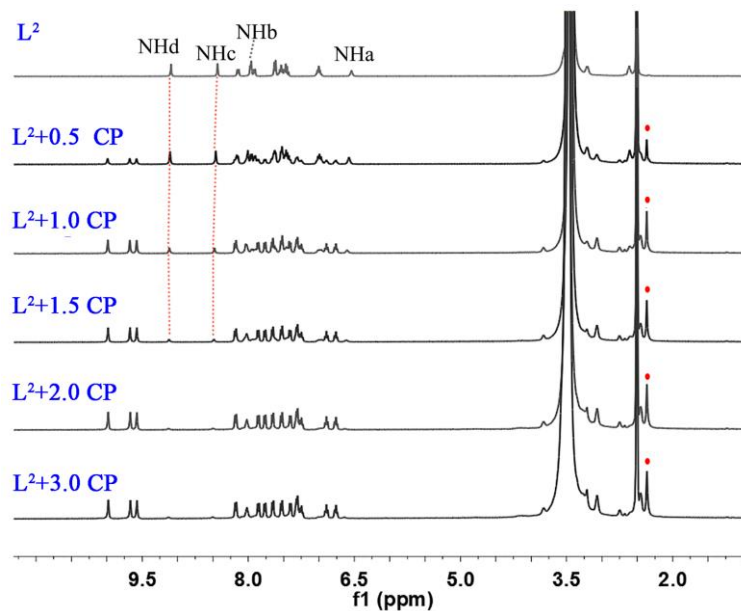

**Fig. S10.**  $^1\text{H}$  NMR titration of  $\text{L}^2$  (2 mM) with CP (DMSO- $d_6$  /2%  $\text{H}_2\text{O}$ , 400 MHz).

**Table S5.** Change of the NH shifts ( $\Delta\delta$ , ppm) of  $\text{L}^1 + \text{CP}$ ,  $\text{L}^2 + \text{CP}$ ,  $\text{L}^2 + \text{ADP}$  and  $\text{L}^2 + \text{ATP}$ .

|                           | $\Delta\delta$ NHd | $\Delta\delta$ NHc | $\Delta\delta$ NHb | $\Delta\delta$ NHa | $\Delta\delta_{\text{av}}$ |
|---------------------------|--------------------|--------------------|--------------------|--------------------|----------------------------|
| $\text{L}^1 + \text{CP}$  | 1.18               | 1.10               | 1.61               | 1.17               | 1.27                       |
| $\text{L}^2 + \text{CP}$  | 0.93               | 1.27               | 1.63               | 1.50               | 1.33                       |
| $\text{L}^2 + \text{ADP}$ | 0.57               | 0.59               | 0.76               | 1.68               | 0.90                       |
| $\text{L}^2 + \text{ATP}$ | 0.58               | 0.72               | 0.75               | 1.75               | 0.95                       |

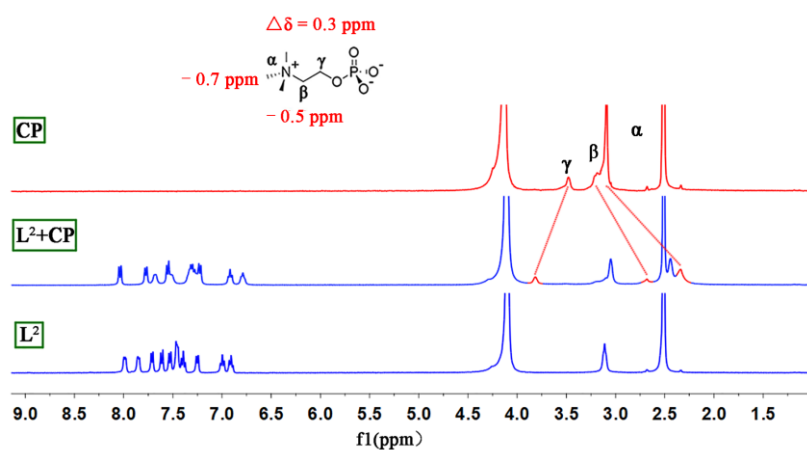

**Fig. S11.** Stacking  $^1\text{H}$  NMR spectra (DMSO- $d_6$  /D $_2$ O, v/v = 75/25, 400 MHz) of CP,  $\text{L}^2$  +1.0 equiv. CP, and  $\text{L}^2$  (2 mM).

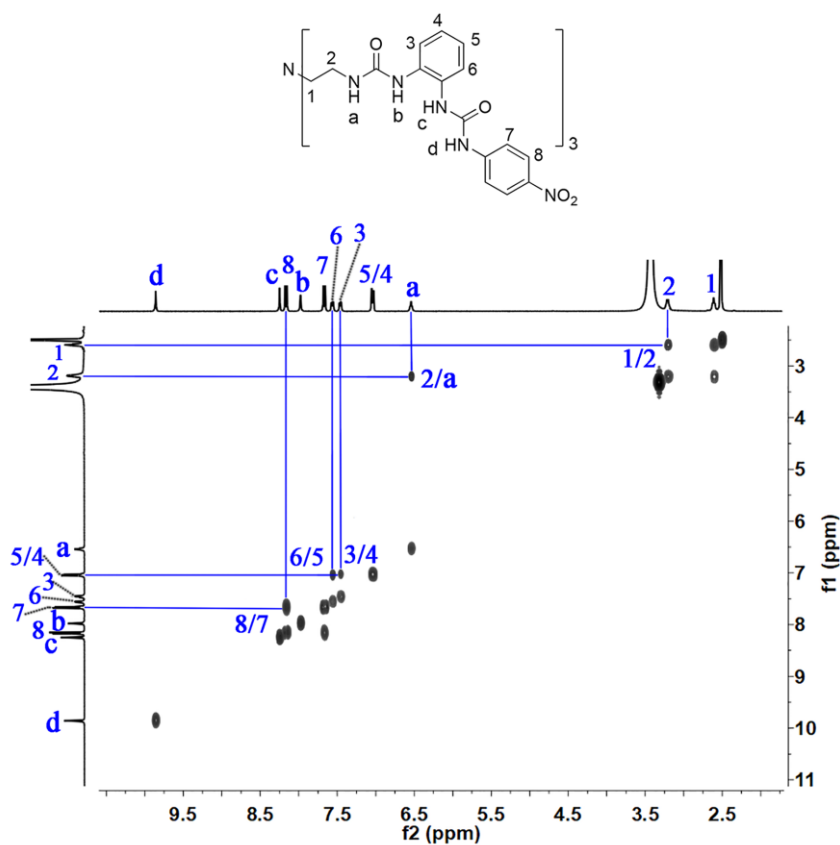

**Fig. S12.** Selected part of  $^1\text{H}$ - $^1\text{H}$  COSY spectrum (DMSO- $d_6$  /2% H $_2$ O, 400 MHz) of  $\text{L}^1$ .

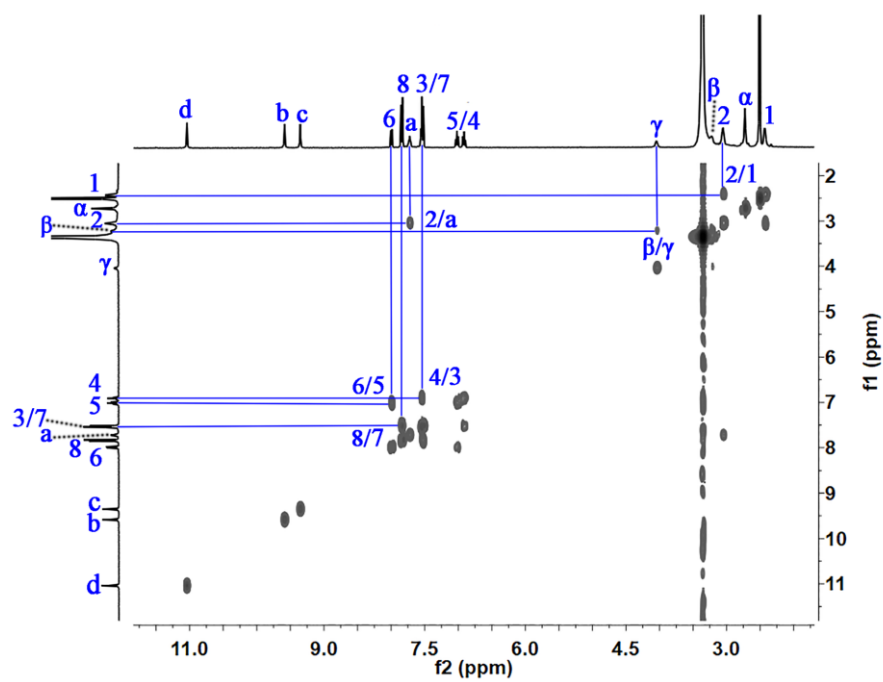

**Fig. S13.** Selected part of  $^1\text{H}$ - $^1\text{H}$  COSY spectrum (DMSO- $d_6$ /2%  $\text{H}_2\text{O}$ , 400 MHz) of  $\text{L}^1$ +CP.

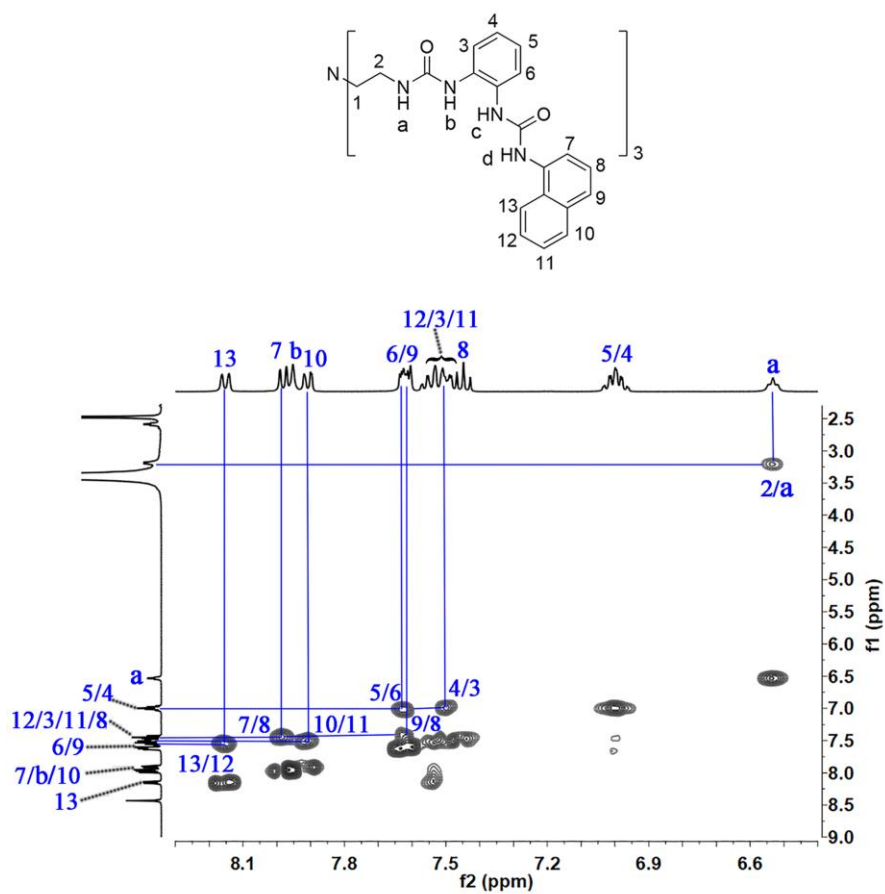

**Fig. S14.** Selected part of  $^1\text{H}$ - $^1\text{H}$  COSY spectrum (DMSO- $d_6$ /2%  $\text{H}_2\text{O}$ , 400 MHz) of  $\text{L}^2$ .

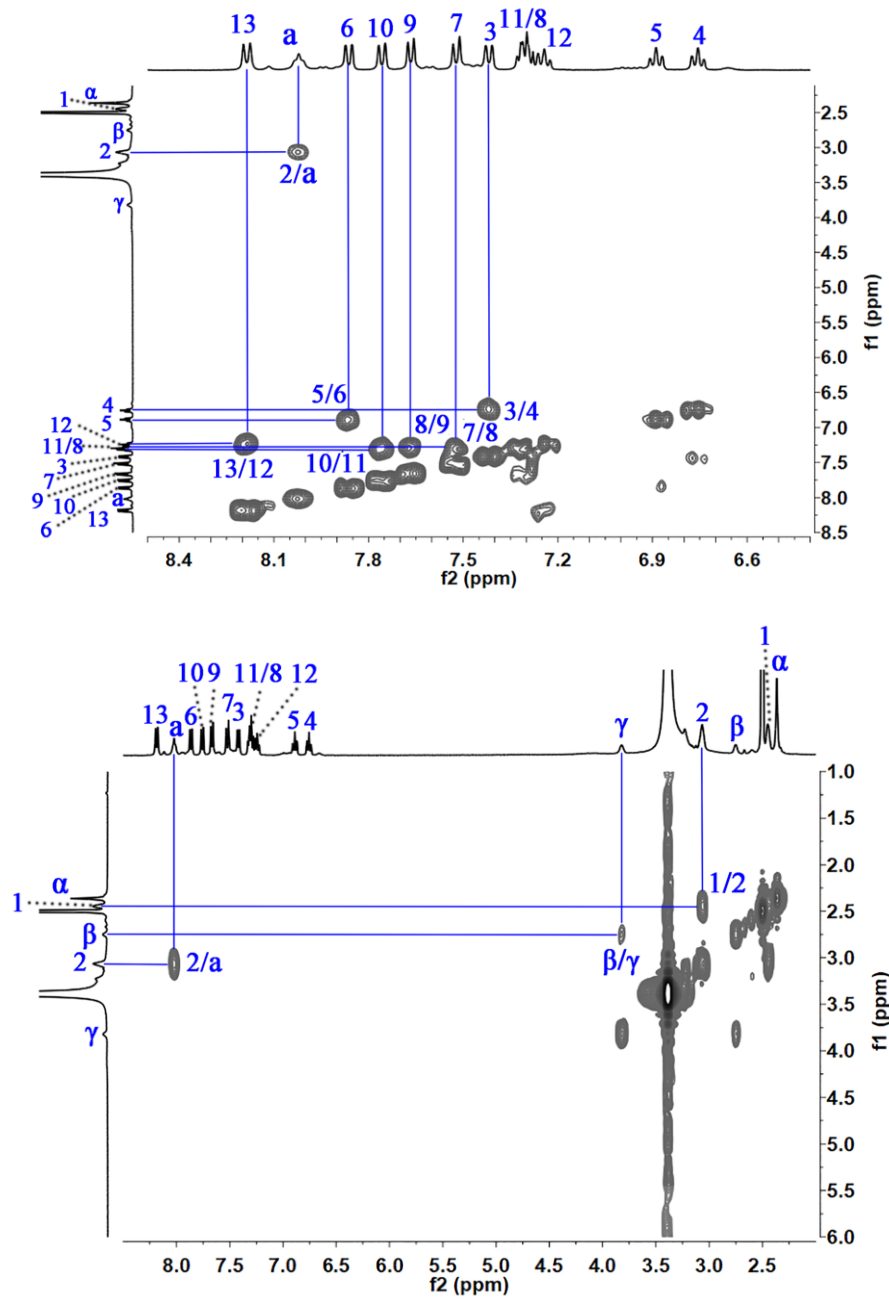

**Fig. S15.** Selected part of  $^1\text{H}$ - $^1\text{H}$  COSY spectrum (DMSO- $d_6$ /2%  $\text{H}_2\text{O}$ , 400 MHz) of  $\text{L}^2+\text{CP}$ .

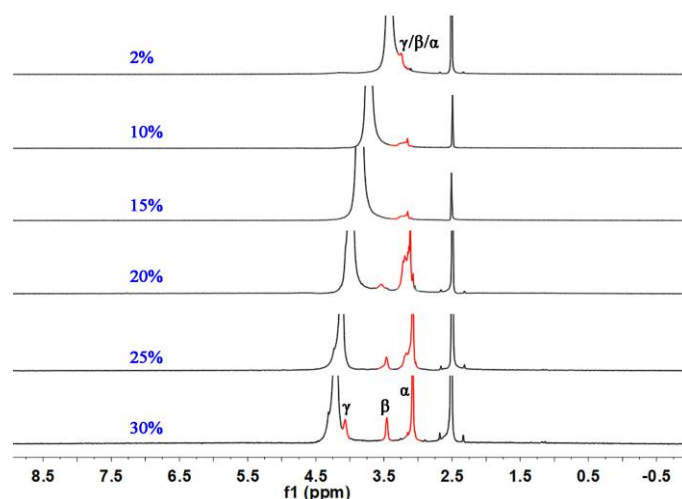

**Fig. S16.**  $^1\text{H}$  NMR spectra of CP in different competitive solvents (DMSO- $d_6$  containing  $\text{D}_2\text{O}$  from 2% to 30%, 400 MHz).

### S5. Fluorescence studies

All fluorescence titrations were performed at room temperature. Certain equivalents of a concentrated guest solution ( $[\text{CP}] = 1.0 \text{ mM}$  or  $10 \text{ mM}$ ;  $[\text{ADP}] = 10.0 \text{ mM}$ ,  $0.5 \text{ M}$ ;  $[\text{ATP}] = 20.0 \text{ mM}$ ,  $0.5 \text{ M}$ ;  $[\text{BP}] = 2.0 \text{ mM}$ ,  $5 \text{ mM}$ ,  $[\text{DBP}] = 10 \text{ mM}$ ,  $0.1 \text{ M}$ ,  $[\text{HClO}_4] = 5 \text{ mM}$ ,  $[\text{Ch}] = [\text{betaine}] = [\text{taurine}] = [\text{BTA}] = 0.5 \text{ M}$ ) were added stepwise to a 3 mL solution of  $\text{L}^2$  in DMSO/ $\text{H}_2\text{O}$  ( $v/v = 98/2$ ). As a very small volume of guest solution was added, the final amount of the solution was almost unchanged (3 mL). The mixed solution was incubated for 30 s and then irradiated at 310 nm. The corresponding emission intensities at 372 nm during titration were then recorded. Solutions of the host  $\text{L}^2$  and guest at the same concentration ( $10 \mu\text{M}$ ) were prepared in DMSO containing 2%  $\text{H}_2\text{O}$ , used for determining the binding stoichiometry. Then the two solutions were mixed in different proportions maintaining a total volume of 3 mL and a total concentration of  $10 \mu\text{M}$ . After incubating the mixture for 30 s, the spectra of the solutions for different compositions were recorded. The data was then collated and combined to produce data files from which so-called Job plots could be constructed.<sup>3</sup>

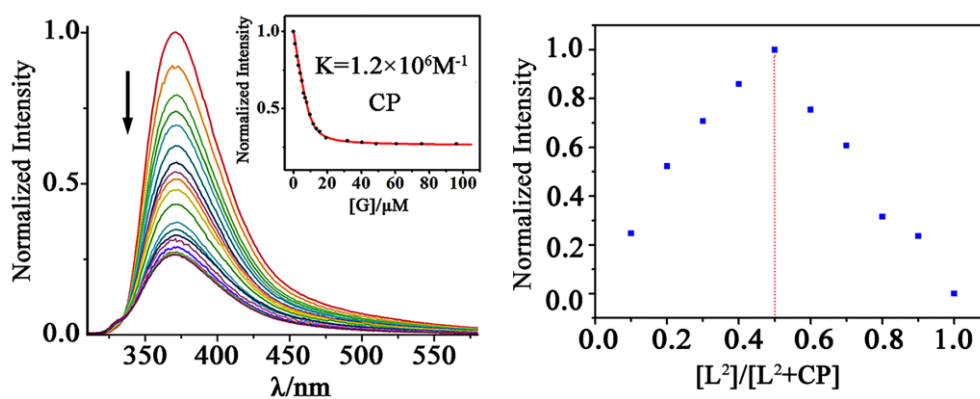

**Fig. S17.** Fluorescence titration of  $\text{L}^2$  ( $10 \mu\text{M}$ ) with CP and Job's plot (DMSO/ $\text{H}_2\text{O}$ ,  $v/v = 98/2$ ).

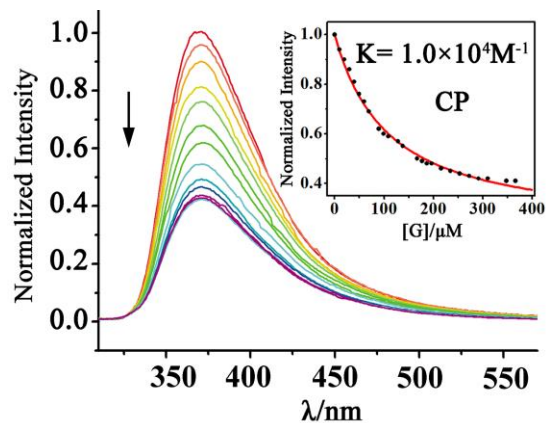

Fig. S18. Fluorescence titration of  $L^2$  ( $10 \mu\text{M}$ ) with CP (DMSO/ $\text{H}_2\text{O}$ ,  $v/v = 75/25$ ).

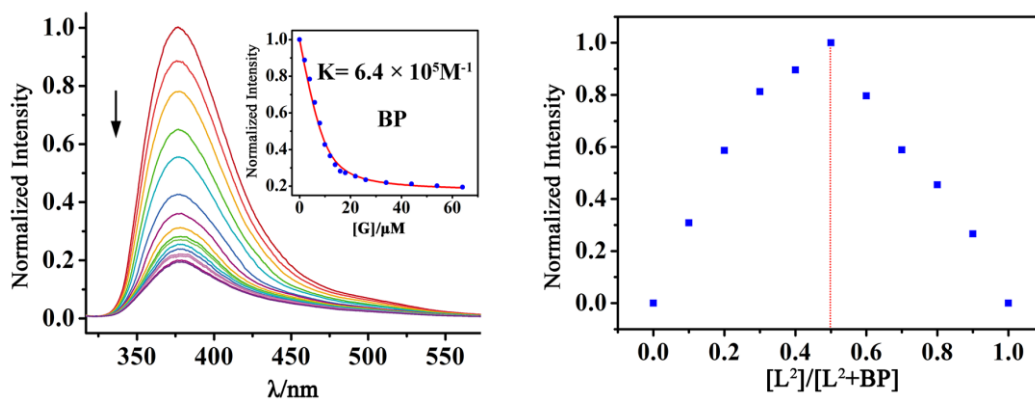

Fig. S19. Fluorescence titration of  $L^2$  ( $10 \mu\text{M}$ ) with BP and Job's plot (DMSO/ $\text{H}_2\text{O}$ ,  $v/v = 98/2$ ).

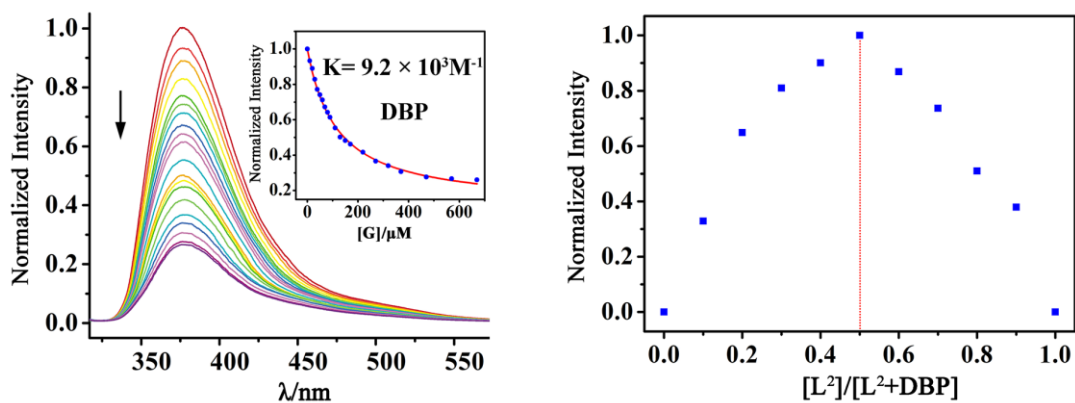

Fig. S20. Fluorescence titration of  $L^2$  ( $10 \mu\text{M}$ ) with DBP and Job's plot (DMSO/ $\text{H}_2\text{O}$ ,  $v/v = 98/2$ ).

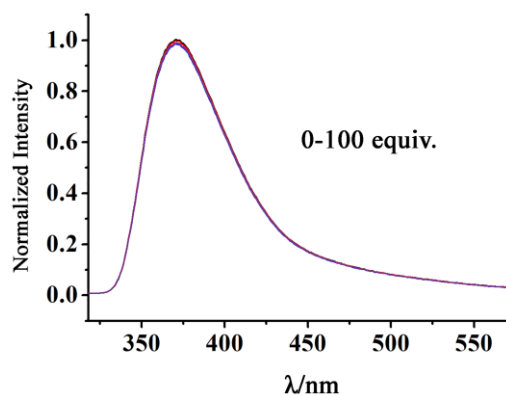

Fig. S21. Fluorescence titration of  $L^2$  (10  $\mu\text{M}$ ) with BTA (DMSO/ $\text{H}_2\text{O}$ , v/v = 98/2).

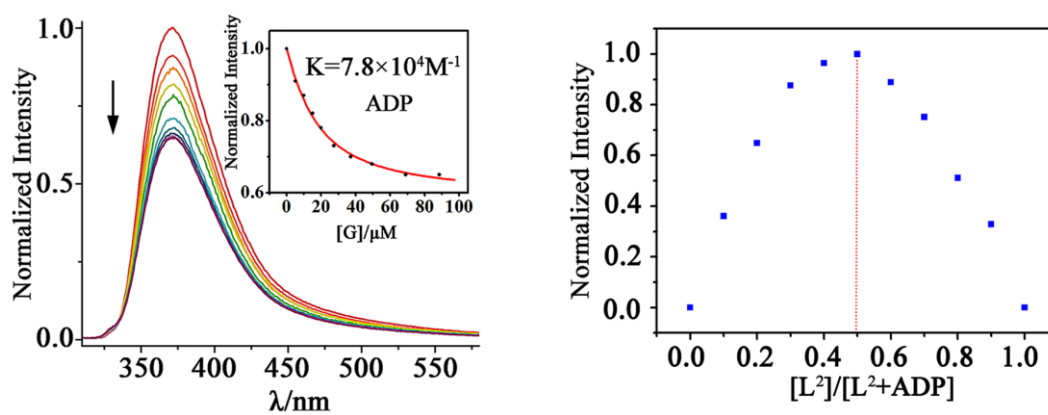

Fig. S22. Fluorescence titration of  $L^2$  (10  $\mu\text{M}$ ) with ADP and Job's plot (DMSO/ $\text{H}_2\text{O}$ , v/v = 98/2).

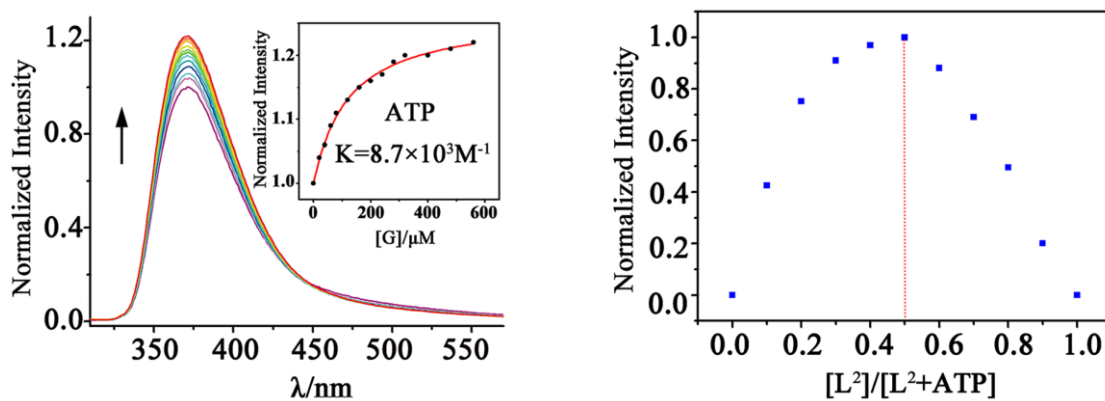

Fig. S23. Fluorescence titration of  $L^2$  (10  $\mu\text{M}$ ) with ATP and Job's plot (DMSO/ $\text{H}_2\text{O}$ , v/v = 98/2).



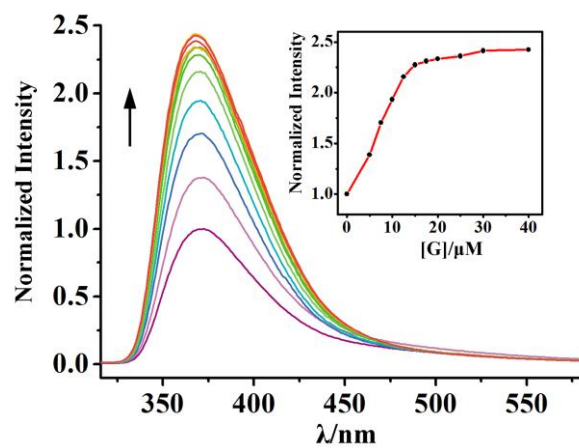

**Fig. S24.** Fluorescence titration of  $L^2$  (10  $\mu M$ ) with  $HClO_4$  (DMSO/ $H_2O$ , v/v = 98/2).

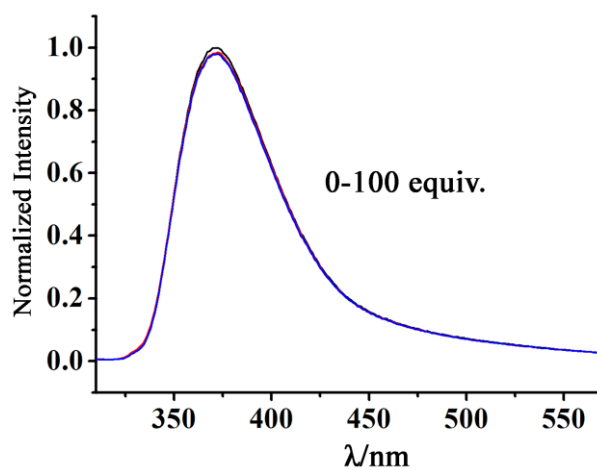

**Fig. S25.** Fluorescence titration of  $L^2$  (10  $\mu M$ ) with Ch (DMSO/ $H_2O$ , v/v = 98/2).

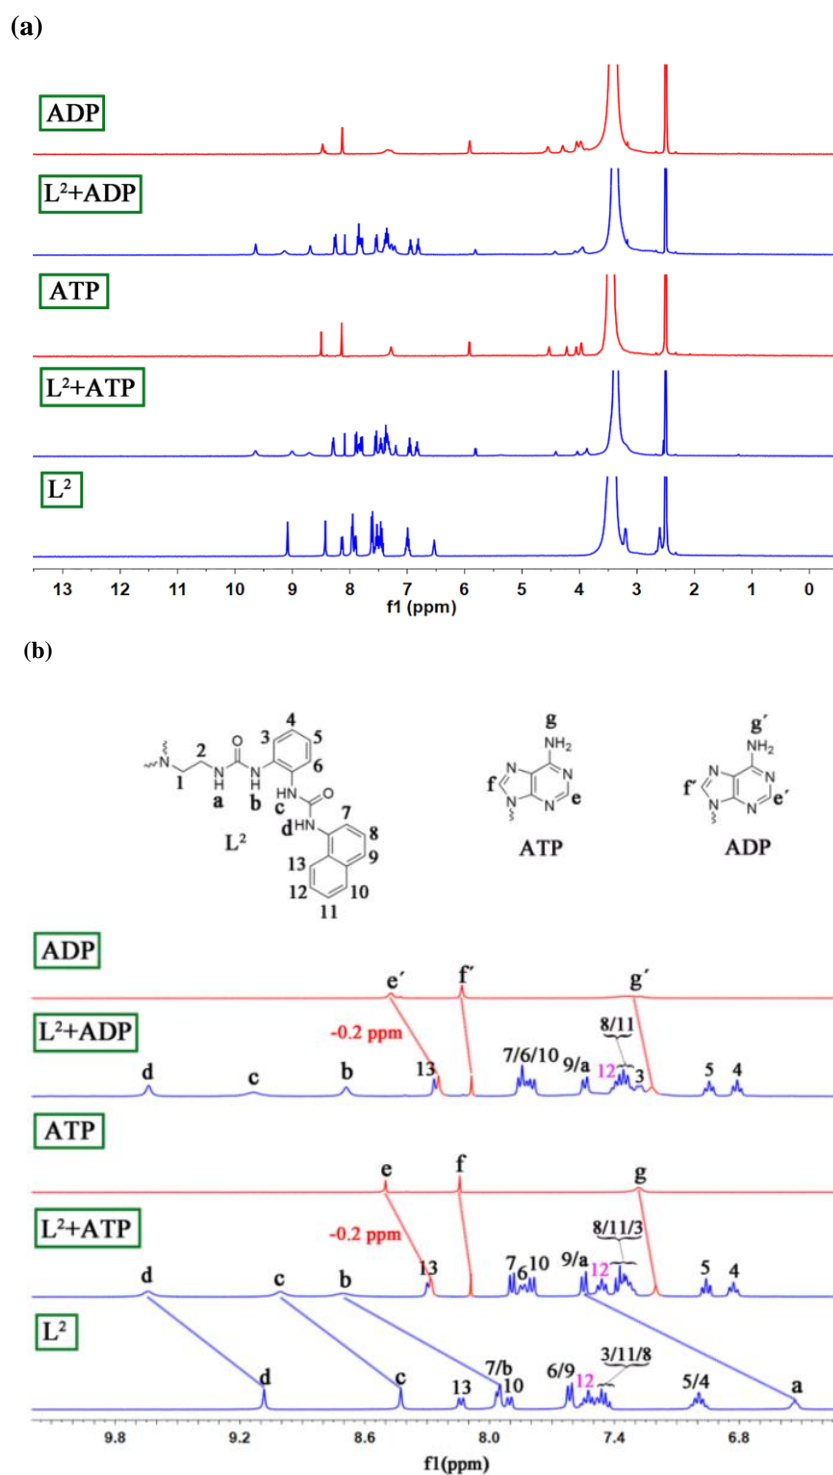

**Fig. S26.** (a)  $^1\text{H}$  NMR spectra of  $\text{L}^2$  (2.0 mM) with 1.0 equiv of different guests (DMSO- $d_6$ /2%  $\text{H}_2\text{O}$ , 400 MHz); (b) Enlarged partial  $^1\text{H}$  NMR spectra of  $\text{L}^2$  (2 mM),  $\text{L}^2 + \text{ATP}$  (1.0 equiv.), ATP,  $\text{L}^2 + \text{ADP}$  (1.0 equiv.), and ADP.

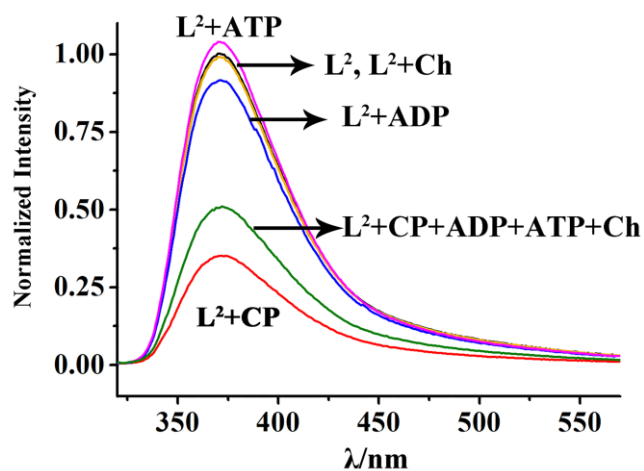

**Fig. S27.** Normalized spectra of  $L^2$  ( $10 \mu\text{M}$ ) upon addition of 1.0 equiv. of different guests (DMSO/ $\text{H}_2\text{O}$ ,  $v/v = 98/2$ ).

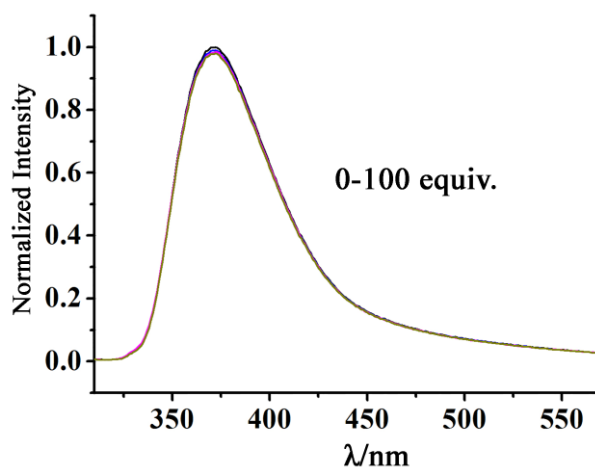

**Fig. S28.** Fluorescence titration of  $L^2$  ( $10 \mu\text{M}$ ) with taurine (DMSO/ $\text{H}_2\text{O}$ ,  $v/v = 98/2$ ).

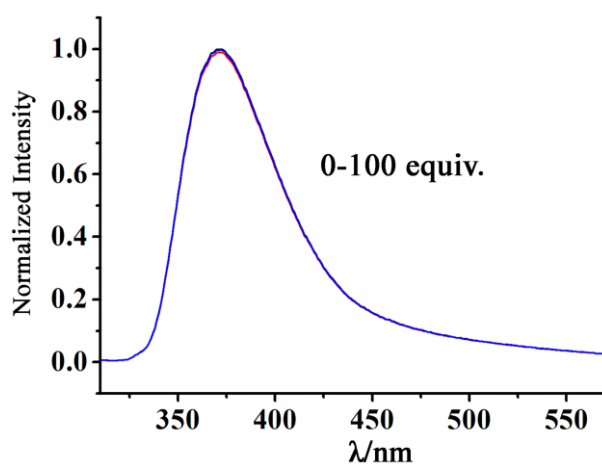

**Fig. S29.** Fluorescence titration of  $L^2$  ( $10 \mu\text{M}$ ) with betaine (DMSO/ $\text{H}_2\text{O}$ ,  $v/v = 98/2$ ).

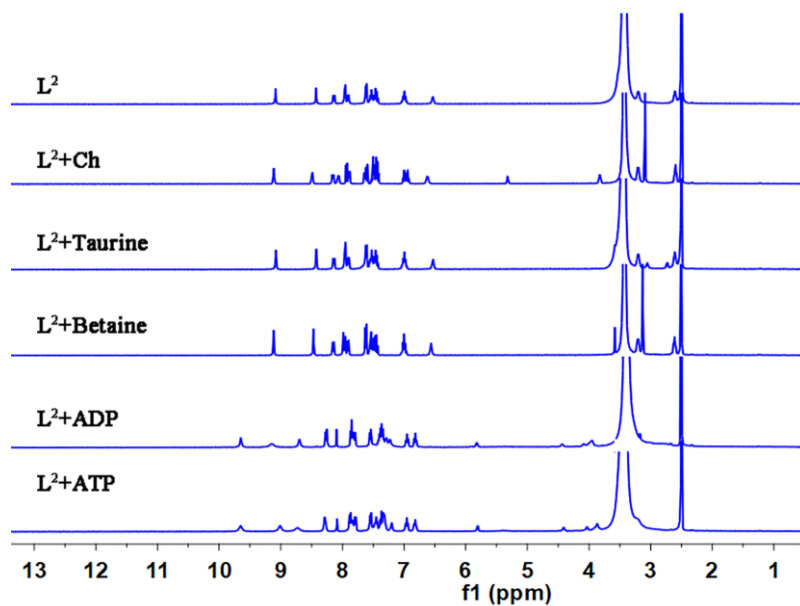

**Fig. S30.**  $^1\text{H}$  NMR spectra of  $\text{L}^2$  (2.0 mM) with 1.0 equiv of different guests ( $\text{DMSO-}d_6$  / 2%  $\text{H}_2\text{O}$ , 400 MHz).

## References

- (1) C. Jia, B. Wu, S. Li, X. Huang, Q. Zhao, Q.-S. Li, X.-J. Yang, *Angew. Chem. Int. Ed.* **2011**, *50*, 486–490.
- (2) E. A. Padlan, G. H. Cohen, D. R. Davies, PDB ID: 2MCP; unpublished work.
- (3) J. L. Sessler, E. Katayev, G. D. Pantosa, Y. A. Ustynyuk, *Chem. Commun.* **2004**, 1276–1277.
